# Supplementary material
Source: Copernicus journal article supplement (doi:10.5194/bg-23-4171-2026)
Supplement: Supplementary file 1 [file bg-23-4171-2026-supplement.pdf]

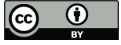

*Supplement of*

## **Ammonia and nitrite oxidation in the upper euphotic zone of the oligotrophic Red Sea**

**Eyal Rahav et al.**

*Correspondence to:* Eyal Rahav (eyrahav@ucsc.edu, eyal.rahav@ocean.org.il)

The copyright of individual parts of the supplement might differ from the article licence.

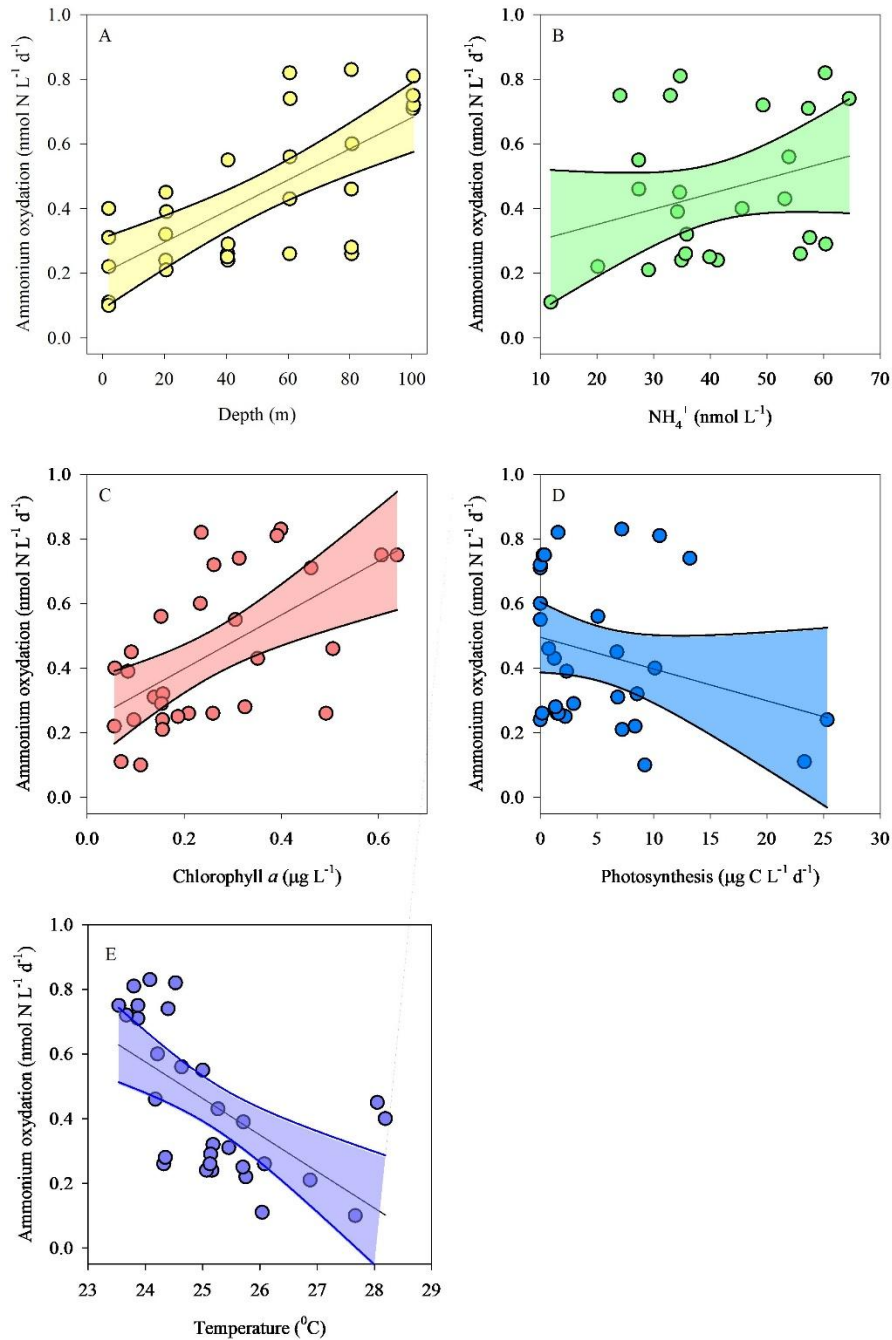

**Figure S1.** Visual representation of the relationships between key environmental variables and ammonia oxidation rates across all samples (0-100 m). Data shown is ammonia oxidation rates vs. (A) depth ( $r=0.72$ ,  $p<0.001$ ), (B)  $\text{NH}_4^+$  ( $r=0.30$ ,  $p=0.14$ ), (C) chlorophyll *a* ( $r=0.59$ ,  $p=0.001$ ), (D) photosynthesis ( $r=0.28$ ,  $p=0.139$ ) and (E) temperature ( $r=0.61$ ,  $p=0.01$ ). The black line shows the linear fit and the background area signifies the 95% confidence interval. For the full descriptive statistics see Tables S1 and S2.

**Table S1:** Pearson correlation statistics between environmental variables and ammonium oxidation rates. Correlation coefficients ( $r$ ), coefficients of determination ( $r^2$ ), sample size ( $n$ ), and corresponding  $p$ -values are shown for pairwise relationships calculated across all observations (0-100 m, all cruises). Correlations reflect co-variation among variables and do not imply causation.

| <b>Variable</b> | <b>n</b> | <b>r</b> | <b>r<sup>2</sup></b> | <b>p-value</b> |
|-----------------|----------|----------|----------------------|----------------|
| Pressure        | 30       | 0.719    | 0.517                | <0.001         |
| Temperature     | 30       | -0.612   | 0.375                | <0.001         |
| Salinity        | 30       | -0.297   | 0.088                | 0.111          |
| Density         | 30       | 0.629    | 0.395                | <0.001         |
| Oxygen          | 30       | 0.266    | 0.071                | 0.155          |
| PAR             | 30       | -0.486   | 0.236                | 0.007          |
| pH              | 29       | 0.008    | ~0.000               | 0.969          |
| NH <sub>4</sub> | 25       | 0.303    | 0.092                | 0.141          |
| NO <sub>2</sub> | 30       | 0.554    | 0.306                | 0.002          |
| NO <sub>3</sub> | 30       | 0.294    | 0.087                | 0.115          |
| PO <sub>4</sub> | 30       | -0.117   | 0.014                | 0.536          |
| Chl-a           | 30       | 0.591    | 0.349                | <0.001         |
| Photosynthesis  | 30       | -0.277   | 0.077                | 0.139          |
| DCF             | 29       | 0.178    | 0.032                | 0.356          |

**Table S2:** Pearson correlation statistics between environmental variables and nitrite oxidation rates. Correlation coefficients ( $r$ ), coefficients of determination ( $r^2$ ), sample size ( $n$ ), and corresponding p-values are shown for pairwise relationships calculated across all observations (0-100 m, all cruises). Correlations reflect co-variation among variables and do not imply causation.

| <b>Variable</b> | <b>n</b> | <b>r</b> | <b>r<sup>2</sup></b> | <b>p-value</b> |
|-----------------|----------|----------|----------------------|----------------|
| Pressure        | 30       | 0.728    | 0.531                | <0.001         |
| Temperature     | 30       | -0.574   | 0.329                | <0.001         |
| Salinity        | 30       | -0.152   | 0.023                | 0.424          |
| Density         | 30       | 0.620    | 0.384                | <0.001         |
| Oxygen          | 30       | 0.329    | 0.108                | 0.076          |
| PAR             | 30       | -0.494   | 0.244                | 0.006          |
| pH              | 29       | 0.020    | ~0.000               | 0.920          |
| NH <sub>4</sub> | 25       | 0.286    | 0.082                | 0.165          |
| NO <sub>2</sub> | 30       | 0.443    | 0.197                | 0.014          |
| NO <sub>3</sub> | 30       | 0.449    | 0.202                | 0.013          |
| PO <sub>4</sub> | 30       | -0.301   | 0.091                | 0.106          |
| Chl-a           | 30       | 0.541    | 0.292                | 0.002          |
| Photosynthesis  | 30       | -0.319   | 0.102                | 0.086          |
| DCF             | 29       | 0.494    | 0.244                | 0.006          |
